# Supplementary material for: Toolbox for Genetic Transformation of Non-Conventional Saccharomycotina Yeasts: High Efficiency Transformation of Yeasts Belonging to the Schwanniomyces Genus
Source: MDPI journal article supplement (doi:10.3390/jof8050531), 2022-05-20
Supplement: s1 [file s1]

---

## Supplementary figures

> oBle

atgggaatgacagatcaggccaccctaatttccaagtagagactttgatccaactgcagccttttacgagcgtttggggtttggtatagtgtccgtgacgctgggtggatg  
atacttcagcgtggggattaatgcttgagttcttctcatcctggacttgaccattagcttctggttctcctgtttgctgttgcgatttgccgaattttacagacaatgt  
aagagtgtcggaaatacaggaaacttctctggttatcctagaatacacgctcctgagttgcaagagtgggggggaacaatggctgctttagtagatcctgacggaactttatt  
acgtcttatccagaatgaacttcttcaggaataatcttga

> oHyg

atgggaaagaacctaacttactgcaacatccgtcgaaaagttttaattgagaatttgatagtgtgtccgaccttatgcaacttagtgaaggagaagagtcaagagctttt  
agttttgatgtaggaggacgttggttatgtcttgagagtcaatagtgtgcagatggatttacaaggatcggtatgtctatcgtcatttcgctccgccccttaccaatccctgaa  
gtcttagacataggggagttctcagagtccttaacttactgcataatccgtagagcacaaggagtactcttcaggacttgccagagacagaattacctgcccgtcttcagccag  
ttgccgaggcaatggacgctatagccgtgcagacttatccaaactagtggattcgggccatttggctctcaaggaaatgggcaataatactacatggcgtgatttcatctgcg  
caatagcagaccctcatgtctaccattggcagaccgtaatggacgatactgtatccgcttctgtggcacaagcacttgacgagttaatgttggggcagaggattgtccagaa  
gtcagacatttgggtgcagctgattttgtagtaacaatgtgcttaccgacaatggctgtataaccgagtcacgattgggtcagaagctatgttcggggattcacagtagcag  
gtagccaataatttttctggagaccttggcttgcagtgtgaacagcagaccgttacttgaacgtagacaccagaattagccgggtctccacgtttaagagcttatatgtt  
gagaattggattagaccaactttatcaatctttagtcgatggaaatttcgacgatccgcttgggcccaaggtagatgcgacgccattgtcagaagtggagctggaactgtgg  
ggcgtacccaaattgccgtagatcagccgcagtgtagacagacggatgcgtggaagtattagcagatagtgggaatcgtcgtccttccacacgtccaagccaaggaat  
aa

> oKan

atgggtaaggagaagacacacgtgagtcgtccaagattgaacagtaacatggacgctgatttatacgggtataaatgggctcgtgataatgttgggtcagtcaggagccaca  
atctatagattgtacggaagcctgacgccccagaattgttttgaagcatggttaagggttccgtcgccaatgatgttacagacgaaatgggtgagacttaattgggtgaccgag  
ttcatgcctttacctacatcaaacacttcataagaacacctgacgacgcatggttacttacaacagctatccctggttaagactgattccaggttcttgaggagtatccagactca  
gggtgagaacattgtcgatgccttagcagtggttctctctagattacattcaataccagtttgaattgcctttcaatttctgtagagtgttctgcttctcaagctcagtcctgtatg  
aataatgggttgggtgagcttccgacttcgacgacgaacgtaacgggtggccagttgaacaagcttggaagaaatgcacaaattattaccattctcacctgattcagtggtg  
actcacggtgatttctcattgacaatttgatattgatgaaggtaaatatagggtgcatagatgttgggagagtcggtatagccgaccgttaccaagatttagctattctttg  
gaattgttgggggagttcagtccttcacttcagaacgtttatttcagaagtacggaatagacaatccagacatgaacaagttgcagtttacttaattgttgacgaatttttcta  
a

> oNrs

atggggaccacattagatgacaccgcataatcgttacgtacatccgtcccaggagacgccgaagctattgaggcacttgacggatcattcacaaccgacacagtattagagt  
taccgtacagggtgatggattcaccttctgtgaggtgccagtagatccaccacttaccaaagtatttccagatgacgagagtgcagatgagagtgcagatggggaggacgg  
agaccagactccagaacctttgtcgctatggagacgatggtgatttggctggttctcgtgtgtcttactcaggtggaacagacgtttaactgtggaggacatcgaagt  
gtccagagcacagaggacatggggtaggacgtgcttaattgggattagctactgagttcgccgtgagcgtggagctggctcatttgggttgggaagtactaacgtgaac  
gcactgccatacatgataccgtagaatgggattcactcttgtggtttagataccgcatgtgatgacggaaccgcatctgatggtgagcaagccttatatatgtctatgccatg  
cccttaa

**Supplementary Figure 1.** Sequences of *de novo* synthesised ORFs encoding antibiotic resistance markers.

### Plasmids carrying **cloNAT** resistance marker

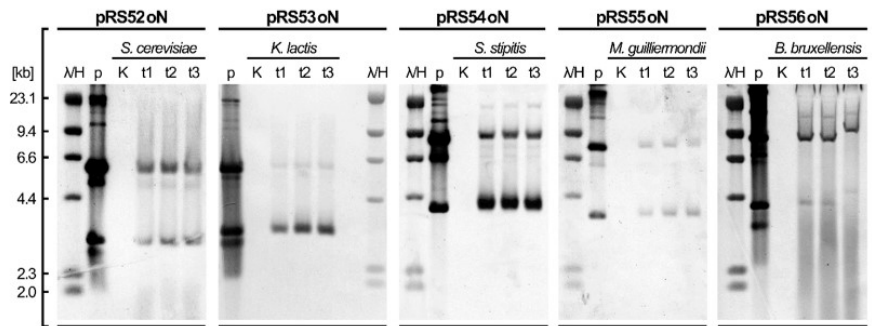

### Plasmids carrying **hygromycin B** resistance marker

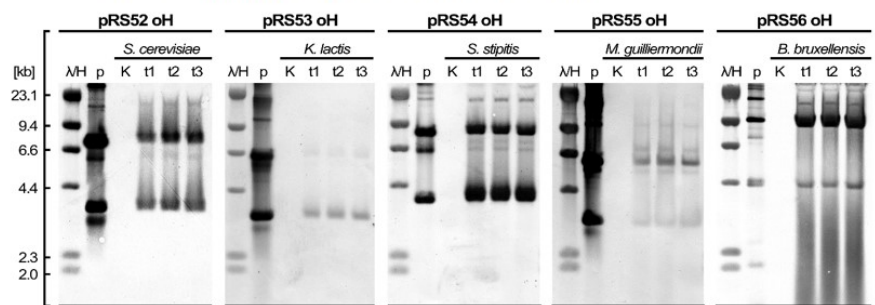

### Plasmids carrying **geneticin G418** resistance marker

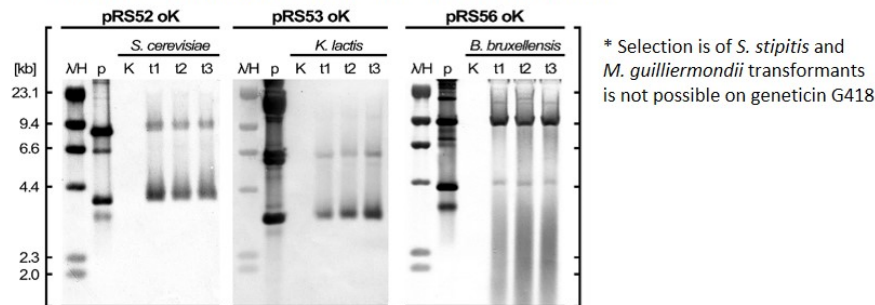

\* Selection of *S. stipitis* and *M. guilliermondii* transformants is not possible on geneticin G418

### Plasmids carrying **phleomycin** resistance marker

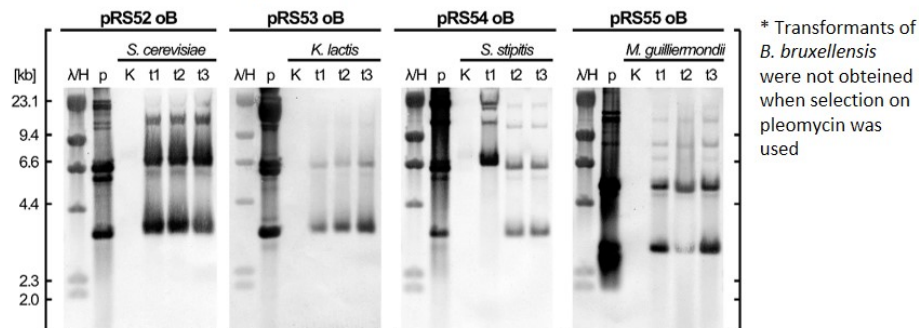

\* Transformants of *B. bruxellensis* were not obtained when selection on phleomycin was used

**Supplementary Figure 2.** Genetic analysis of yeast transformants by Southern blot of the undigested genomic DNA, with digoxigenin-labelled probe hybridising to genes *bla* and *ori* present in the plasmid backbones. Each of the membranes focuses on the combination of one yeast species (columns) and its replicative plasmids conferring resistance to cloNAT, hygromycin B, G418, or phleomycin (rows). λ/H = marker (phage λ DNA digested with HindIII), p = replicative plasmid isolated from *E. coli*, K = untransformed yeast strain, t1-t3 = three yeast transformants.
